# Supplementary material
Source: HighWire-hosted journal article supplement (http://www.cmaj.ca/highwire/filestream/59847/field_highwire_adjunct_files/0/151382-res-1-at.pdf)
Supplement: 151382-res-1-at.pdf [file 151382-res-1-at.pdf]

| <b>Severe maternal morbidity - diagnosis</b>                                                 | <b>ICD-10CA code</b> |
|----------------------------------------------------------------------------------------------|----------------------|
| <b>Maternal death</b>                                                                        | O95                  |
| <b>Eclampsia</b>                                                                             | O15                  |
| <b>Cardiac arrest, cardiac failure or myocardial infarction</b>                              |                      |
| Cardiac complications due to anesthesia during the puerperium                                | O89.1                |
| Cardiac complications due to anesthesia during labour and delivery                           | O74.2                |
| Other complications of obstetric surgery and procedures                                      | O75.4                |
| ST elevation (STEMI) and non-ST elevation (NSTEMI) myocardial infarction                     | I21                  |
| Subsequent ST elevation (STEMI) and non-ST elevation (NSTEMI) myocardial infarction          | I22                  |
| Cardiac arrest                                                                               | I46                  |
| Heart failure                                                                                | I50                  |
| Pulmonary oedema                                                                             | J81                  |
| Cardiogenic shock                                                                            | R57.0                |
| <b>Cardiomyopathy</b>                                                                        |                      |
| Cardiomyopathy in the puerperium                                                             | O90.3                |
| Cardiomyopathy                                                                               | I42                  |
| Cardiomyopathy in diseases classified elsewhere                                              | I43                  |
| <b>Obstetric shock</b>                                                                       |                      |
| Shock during or following labour and delivery                                                | O75.1                |
| Shock, not elsewhere classified                                                              | R57                  |
| Anaphylactic shock due to serum                                                              | T80.5                |
| Anaphylactic shock due to adverse effect of correct drug or medicament properly administered | T88.6                |
| <b>Obstetric embolism</b>                                                                    | O88                  |
| <b>Uterine scar dehiscence/rupture</b>                                                       |                      |
| Dehiscence/Rupture of uterus before labour                                                   | O71.0                |
| Dehiscence/Rupture of uterus during labour                                                   | O71.1                |
| <b>Acute abdomen</b>                                                                         |                      |
| Acute appendicitis                                                                           | K35                  |
| Unspecified appendicitis                                                                     | K37                  |
| Peritonitis                                                                                  | K65                  |
| Female acute pelvic peritonitis                                                              | N73.3                |
| Female pelvic peritonitis, unspecified                                                       | N73.5                |
| <b>Hepatic failure</b>                                                                       |                      |
| Toxic liver disease                                                                          | K71                  |
| Hepatic failure, not elsewhere classified                                                    | K72                  |
| <b>Renal failure</b>                                                                         |                      |
| Postpartum acute renal failure                                                               | O90.4                |
| Acute renal failure                                                                          | N17                  |
| Unspecified kidney failure                                                                   | N19                  |
| Postprocedural renal failure                                                                 | N99.0                |

|                                                                               |                                                      |
|-------------------------------------------------------------------------------|------------------------------------------------------|
| <b>Septicemia during labour</b>                                               |                                                      |
| Other infection during labour (sepsis during labour)                          | O75.3                                                |
| Septic shock                                                                  | R57.2                                                |
| <b>Puerperal sepsis</b>                                                       | O85                                                  |
| <b>Placental abruption</b>                                                    | O45                                                  |
| <b>Placenta previa with hemorrhage</b>                                        | O441                                                 |
| <b>Complications of anesthesia</b>                                            |                                                      |
| Pulmonary complications of anesthesia during pregnancy                        | O29.0                                                |
| Cardiac complications of anesthesia during pregnancy                          | O29.1                                                |
| Central nervous system complications of anesthesia during pregnancy           | O29.2                                                |
| Pulmonary complications of anesthesia during the puerperium                   | O89.0                                                |
| CNS complications of anesthesia during the puerperium                         | O89.2                                                |
| Aspiration pneumonitis due to anesthesia during labour and delivery           | O74.0                                                |
| Other pulmonary complications of anesthesia during labour and delivery        | O74.1                                                |
| Cardiac complications due to anesthesia during labour and delivery            | O74.2                                                |
| CNS complications due to anesthesia during labour and delivery                | O74.3                                                |
| <b>CNS morbidity</b>                                                          |                                                      |
| Cerebral venous thrombosis in pregnancy                                       | O22.5                                                |
| Central nervous system complications of anesthesia during labour and delivery | O74.3                                                |
| CNS complications of anesthesia during the puerperium                         | O89.2                                                |
| Non-traumatic subarachnoid hemorrhage                                         | I60                                                  |
| Non-traumatic intracerebral hemorrhage                                        | I61                                                  |
| Other and unspecified non-traumatic intracranial hemorrhage                   | I62                                                  |
| Cerebral infarction                                                           | I63                                                  |
| Stroke, not specified as hemorrhage or infarction                             | I64                                                  |
| <b>Severe maternal morbidity - procedure</b>                                  | <b>CCI code</b>                                      |
| Dialysis                                                                      | 1.PZ.21^^                                            |
| Repair of bladder, urethra, or intestine                                      | 5.PC.80.JR<br>1.NK.80^^<br>1.NM.80^^                 |
| PPH with embolization/ligation/suture of uterus*                              | 1.RM.13^^<br>1.KT.51<br>5.PC.91.LA                   |
| Assisted ventilation                                                          | 1.GZ.31.CA-ND<br>1.GZ.31.CR-ND                       |
| Caesarean hysterectomy                                                        | 5.MD.60.RC<br>5.MD.60.RD<br>5.MD.60.KE<br>5.MD.60.CB |
| Evacuation of incisional hematoma                                             | 5PC.73.JS                                            |

NOTE: Registry-specific variables were used to identify blood transfusions and obstetric trauma.

\* Included only women with diagnosed postpartum hemorrhage (PPH).
